# Supplementary material for: Wavefront-enhanced laser-induced breakdown spectroscopy (WELIBS) utilizing a crystalline silicon wafer for a flat-top IR laser beam
Source: Royal Society of Chemistry journal article supplement (doi:10.1039/d3ja00245d), 2023-12-29
Supplement: d3ja00245d1.pdf [file d3ja00245d1.pdf]

Supplementary

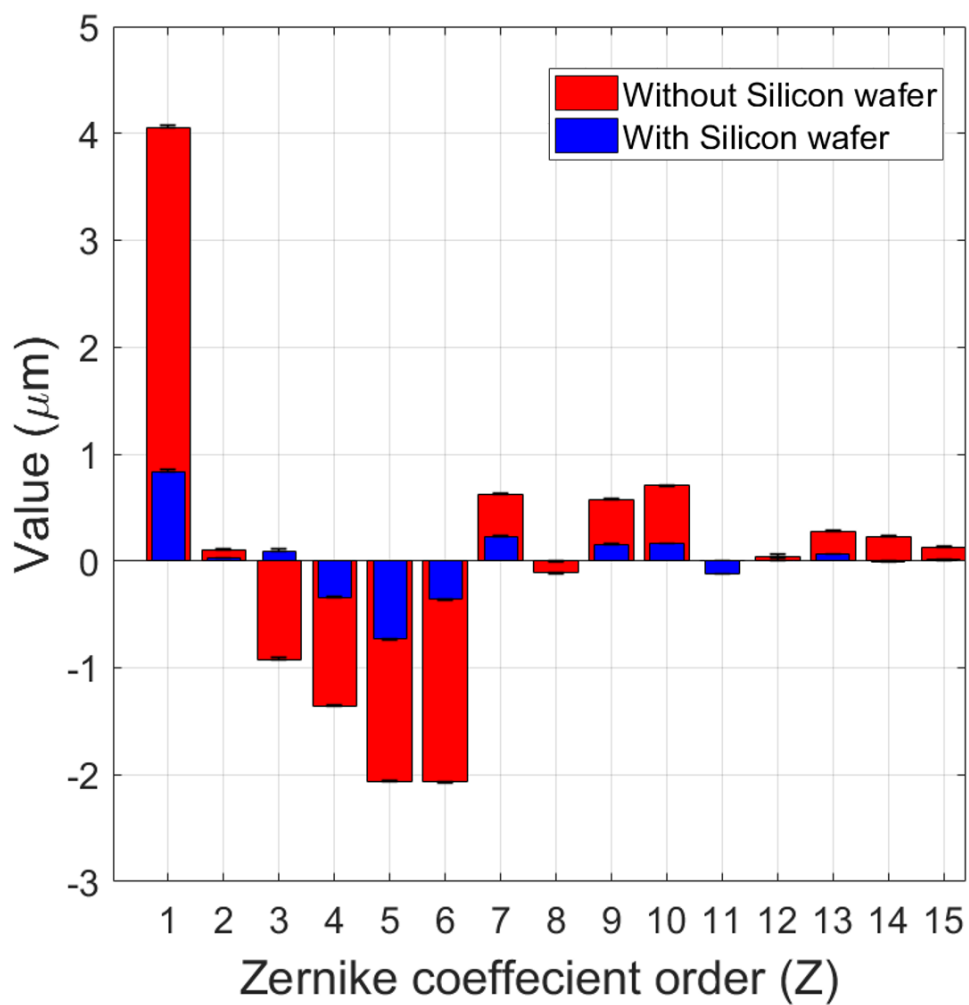

1S: The measured wavefront decomposition of the first 15 Zernike coefficients without and with the silicon wafer. The error bars have been calculated for three sequential wavefront measurements.

Table S.1:

Sn, Cu, Pb, and Zn spectral atomic emission lines used in the present work and their physical parameters

| Species | Wavelength<br>(nm) | $E_i$<br>( $\text{cm}^{-1}$ ) | $E_k$<br>( $\text{cm}^{-1}$ ) | $A_{ki} \cdot 10^8$<br>( $\text{s}^{-1}$ ) | $g_k$ | $g_i$ |
|---------|--------------------|-------------------------------|-------------------------------|--------------------------------------------|-------|-------|
| Sn (I)  | 270.65             | $1.691 \times 10^3$           | $3.862 \times 10^4$           | 0.500                                      | 5     | 3     |
|         | 283.99             | $3.427 \times 10^3$           | $3.862 \times 10^4$           | 1.571                                      | 5     | 5     |
|         | 286.33             | 0.000                         | $3.491 \times 10^4$           | 0.579                                      | 3     | 1     |
|         | 300.91             | $1.691 \times 10^3$           | $3.491 \times 10^4$           | 0.371                                      | 3     | 3     |
|         | 303.41             | $1.691 \times 10^3$           | $3.464 \times 10^4$           | 1.890                                      | 1     | 3     |
|         | 326.23             | $8.612 \times 10^3$           | $3.925 \times 10^4$           | 2.700                                      | 3     | 5     |
| Cu(I)   | 296.12             | $1.12 \times 10^4$            | $4.496 \times 10^4$           | 0.038                                      | 8     | 6     |
|         | 301.084            | $1.12 \times 10^4$            | $4.44 \times 10^4$            | 0.0129                                     | 6     | 6     |
|         | 324.75             | 0.000                         | $3.078 \times 10^4$           | 1.370                                      | 4     | 2     |
| Pb(I)   | 280.19             | $1.0650 \times 10^4$          | $4.6328 \times 10^4$          | 1.081                                      | 5     | 7     |
|         | 287.5              | $1.0650 \times 10^4$          | $4.544 \times 10^4$           | 0.304                                      | 5     | 5     |
|         | 363.97             | $7.81 \times 10^3$            | $3.52 \times 10^4$            | 0.32                                       | 3     | 3     |
| Zn(I)   | 334.50             | $3.289 \times 10^4$           | $6.277 \times 10^4$           | 1.700                                      | 7     | 5     |
|         | 472.24             | $3.25 \times 10^4$            | $5.37 \times 10^4$            | 0.58                                       | 3     | 3     |
